# Supplementary material for: Transport and chemistry: general discussion
Source: Royal Society of Chemistry journal article supplement (doi:10.1039/d5fd90013a), 2025-01-01
Supplement: d5fd90013a1.zip [file d5fd90013a1.zip]

## Sheet: ReadMe
Fairbanks PM2.5 5% 2024 Amendments SIP
Sector Emission Summary Calculation Spreadsheet
(07/30/24)
Note: This spreadsheet is common to Appendices III.D.7.06 (Inventory), III.D.7.09 (Attainment) and III.D.7.10 (RFP/QM)
Sheet Tab(s)	Description
RFP-Rev5Pct	This sheet contains Reasonable Further Progress (RFP) emission inventory calculations and compares control emissions to linear RFP targets in applicable Quantitative Milestone (QM) years of 2020, 2023, 2026 and 2029 based on the 2020 Baseline and 2027 Control/Attainment nonattainment area inventories. Applicable pollutants are PM2.5, SO2 and NH3.
Emis-Rev5Pct	This sheet contains 2020 Baseline and Control nonattainment area inventories from 2020-2029 that are used to calculate 5% per year reduction targets and evaluate compliance with Section 189(d) 5% per year emission reduction requirements for applicable pollutants PM2.5 and SO2. Only years 2020-2027 are applicable.
SectorSumYYYY	Tabulated summaries of emissions by source sector and sector percentage contributions for both the Grid 3 modeling domain and the PM2.5 nonattainment area where YYYY is the inventory year: 2020 Baseline, 2026 Control, 2027 Control; 2027PB is 2027 Projected Baseline.
OYWCalcs	Calculation of One Year's Worth (OYW) emission reduction targets by candidate attainment year based on EPA's March 2023 Draft Contingency Measure guidance. OYW attainment emission targets from this sheet are copied into "CMSummary" tab of 2024Amendment_ControlMeasureBenefits_DftFnl.xlsx spreadsheet.
Points	Detailed emissions for the Point source sector by calendar year and control scenario (Baseline vs. Control), including facility-specific emissions
SpaceHeat	Summary tables of: 1) calculated "phase-in/penetration" metrics specific to each quantified control measure used to evaluate attainment and RFP; and 2) calculated control measure specific emission reductions and combined control emissions in the space heating sector by calendar year
OnRoad	This sheet contains modeling domain and nonattainment area on-road mobile source emission summaries tabulated from MOVES3 modeling runs. Emissions are summarized by pollutant and calendar year. Travel activity (VMT) and vehicle populations are also shown.
YYYYNRARSummary	These calendar year-specific sheets contain tabulated modeling domain and nonattainment area emissions for both the Other Area and Non-Road Mobile source sectors. Within the Non-Road Mobile sector, non-road equipment, rail and aircraft emissions are also provided. The YYYY in each sheet name refers to the inventory year.
TabSpHtYYYY	Finally, these sheets contain modeling domain and nonattainment area space heating emissions by heating device/fuel type (i.e., SCC-level) for each applicable inventory year: (2020 Baseline) and 2020-2029 Control.

## Sheet: RFP-Rev5Pct
REVISED 5% SIP NONATTAINMENT AREA EMISSION INVENTORY SUMMARIES & RFP/QM ANALYSIS												TABLES FOR PLOTTING
(DRAFT FINAL - 01/09/2024)
												Direct PM2.5 Emissions - Nonattainment Area (tons/episode day)									RFP Progress for PM2.5
	PM2.5 Emissions (tons/episode-day)												Base	RFP	RFP	Attain	RFP	Base	Attain
Source Sector	2020	2021	2022	2023	2024	2025	2026	2027	2028	2029		Source Sector	2020	2023	2026	2027	2029	2020	2027
Point	0.578884	0.595793	0.603218	0.607295	0.611517	0.615841	0.619994	0.624148	0.628301	0.632454		Point	0.578884	0.607295	0.619994	0.624148	0.632454	0.578884	0.624148
Area-Space Heating	1.97423	1.743	1.57793	1.47973	1.3333	1.1438	0.9394	0.7389	0.6763	0.6104		Area-Space Heating	1.97423	1.47973	0.9394	0.7389	0.6104	1.97423	0.7389
Area-Other	0.114096	0.115607	0.117527	0.119255	0.120933	0.122565	0.124038	0.125512	0.126985	0.128458		Area-Other	0.114096	0.119255	0.124038	0.125512	0.128458	0.114096	0.125512
Mobile-OnRoad	0.0738743	0.0663116	0.0655303	0.0624142	0.0588665	0.0560456	0.0537799	0.0516124	0.0489003	0.0484971		Mobile-OnRoad	0.0738743	0.0624142	0.0537799	0.0516124	0.0484971	0.0738743	0.0516124
Mobile-Aircraft	0.118653	0.119499	0.120355	0.121221	0.121221	0.122986	0.123884	0.124792	0.125712	0.126643		Mobile-Aircraft	0.118653	0.121221	0.123884	0.124792	0.126643	0.118653	0.124792
Mobile-NonRoad (less aircraft)	0.0899217	0.0880483	0.0856811	0.0832643	0.0805909	0.0773895	0.0769728	0.0769034	0.0781965	0.0761385		Mobile-NonRoad	0.0899217	0.0832643	0.0769728	0.0769034	0.0761385	0.0899217	0.0769034
TOTALS	2.94966	2.72826	2.57025	2.47318	2.32643	2.13863	1.93807	1.74187	1.68439	1.62259		TOTALS	2.94966	2.47318	1.93807	1.74187	1.62259	2.94966	1.74187
On-Road PM2.5 Shares by Year:		0.0243054			0.0253034	0.0262064				0.0298887		Linear Trajectory	2.94966	2.43203	1.91441	1.74187	1.74187	2.94966	1.74187
RFP Reduction Target, PM2.5:	0.172542	(2020-2027 linear reduction per year)										Target Reduction		0.517625	1.03525	1.20779	1.20779		1.20779
Linear Trajectory, PM2.5:	2.94966	2.77712	2.60458	2.43203	2.25949	2.08695	1.91441	1.74187	1.74187	1.74187		Achieved Reduction		0.476474	1.01159	1.20779	1.32707		1.20779
Reductions Required, PM2.5:		0.172542	0.345083	0.517625	0.690166	0.862708	1.03525	1.20779	1.20779	1.20779		Linear Progress Met?		No	No	Yes	Yes		Yes
Reductions Achieved, PM2.5:		0.221397	0.379413	0.476474	0.62323	0.811031	1.01159	1.20779	1.26526	1.32707
Balance (surplus/deficit), PM2.5:		0.0488553	0.0343301	-0.0411504	-0.0669366	-0.0516766	-0.0236602	0	0.0574729	0.119277
												SO2 Emissions - Nonattanment Area (tons/episode day)
	SO2 Emissions (tons/episode-day)												Base	RFP	RFP	Attain	RFP	Base	Attain		RFP Progress for SO2
Source Sector	2020	2021	2022	2023	2024	2025	2026	2027	2028	2029		Source Sector	2020	2023	2026	2027	2029	2020	2027
Point	6.62689	6.82046	6.90545	6.95212	7.00046	7.04996	7.0975	7.14505	7.1926	7.24014		Point	6.62689	6.95212	7.0975	7.14505	7.24014	6.62689	7.14505
Area-Space Heating	3.60574	3.71416	3.72938	2.37472	1.9665	1.9703	1.9755	1.9804	1.9857	1.9902		Area-Space Heating	3.60574	2.37472	1.9755	1.9804	1.9902	3.60574	1.9804
Area-Other	0.0284634	0.0288405	0.0293195	0.0297505	0.030169	0.0305763	0.0309438	0.0313113	0.0316787	0.0320462		Area-Other	0.0284634	0.0297505	0.0309438	0.0313113	0.0320462	0.0284634	0.0313113
Mobile-OnRoad	0.00274537	0.00267544	0.00274468	0.00268973	0.00263727	0.00258891	0.00254106	0.0025017	0.0024631	0.00246217		Mobile-OnRoad	0.00274537	0.00268973	0.00254106	0.0025017	0.00246217	0.00274537	0.0025017
Mobile-Aircraft	5.44102	5.47605	5.5115	5.54737	5.54737	5.62042	5.6576	5.69523	5.73331	5.77184		Mobile-Aircraft	5.44102	5.54737	5.6576	5.69523	5.77184	5.44102	5.69523
Mobile-NonRoad (less aircraft)	0.00227252	0.00227252	0.00227252	0.00227252	0.00227252	0.00227252	0.00227252	0.00227252	0.00227252	0.00227252		Mobile-NonRoad	0.00227252	0.00227252	0.00227252	0.00227252	0.00227252	0.00227252	0.00227252
TOTALS	15.7071	16.0444	16.1807	14.9089	14.5494	14.6761	14.7664	14.8568	14.948	15.039		TOTALS	15.7071	14.9089	14.7664	14.8568	15.039	15.7071	14.8568
												Linear Trajectory	15.7071	15.3427	14.9782	14.8568	14.8568	15.7071	14.8568
RFP Reduction Target, SO2:	0.121481	(2020-2027 linear reduction per year)										Target Reduction		0.364442	0.728883	0.850364	0.850364		0.850364
Linear Trajectory, SO2:	15.7071	15.5856	15.4642	15.3427	15.2212	15.0997	14.9782	14.8568	14.8568	14.8568		Achieved Reduction		0.798199	0.940766	0.850364	0.66816		0.850364
Reductions Required, SO2:		0.121481	0.242961	0.364442	0.485922	0.607403	0.728883	0.850364	0.850364	0.850364		Linear Progress Met?		Yes	Yes	Yes	No		Yes
Reductions Achieved, SO2:		-0.337323	-0.473538	0.798199	1.15772	1.03101	0.940766	0.850364	0.759109	0.66816
Balance (surplus/deficit), SO2:		-0.458803	-0.716499	0.433758	0.671795	0.423611	0.211883	0	-0.0912547	-0.182204
												NH3 Emissions - Nonattanment Area (tons/episode day)
	NH3 Emissions (tons/episode-day)												Base	RFP	RFP	Attain	RFP	Base	Attain
Source Sector	2020	2021	2022	2023	2024	2025	2026	2027	2028	2029		Source Sector	2020	2023	2026	2027	2029	2020	2027		RFP Progress for NH3
Point	0.0883912	0.0909731	0.0921067	0.0927293	0.093374	0.0940342	0.0946684	0.0953026	0.0959368	0.0965709		Point	0.0883912	0.0927293	0.0946684	0.0953026	0.0965709	0.0883912	0.0953026
Area-Space Heating	0.1089	0.1081	0.1137	0.1214	0.1236	0.1243	0.1238	0.1235	0.124	0.1246		Area-Space Heating	0.1089	0.1214	0.1238	0.1235	0.1246	0.1089	0.1235
Area-Other	0.0467725	0.0473922	0.0481793	0.0488875	0.0495753	0.0502446	0.0508485	0.0514523	0.0520562	0.05266		Area-Other	0.0467725	0.0488875	0.0508485	0.0514523	0.05266	0.0467725	0.0514523
Mobile-OnRoad	0.0397563	0.0406732	0.0417382	0.0409656	0.0403629	0.0397687	0.0383224	0.0380413	0.0379716	0.0381966		Mobile-OnRoad	0.0397563	0.0409656	0.0383224	0.0380413	0.0381966	0.0397563	0.0380413
Mobile-Aircraft	0	0	0	0	0	0	0	0	0	0		Mobile-Aircraft	0	0	0	0	0	0	0
Mobile-NonRoad (less aircraft)	0.00148332	0.00150871	0.00152605	0.001537	0.00152869	0.00149823	0.00151349	0.00153196	0.0015765	0.00154638		Mobile-NonRoad	0.00148332	0.001537	0.00151349	0.00153196	0.00154638	0.00148332	0.00153196
TOTALS	0.285303	0.288647	0.29725	0.305519	0.308441	0.309846	0.309153	0.309828	0.311541	0.313574		TOTALS	0.285303	0.305519	0.309153	0.309828	0.313574	0.285303	0.309828
												Linear Trajectory	0.285303	0.295814	0.306325	0.309828	0.309828	0.285303	0.309828
RFP Reduction Target, NH3:	-0.00350353	(2020-2027 linear reduction per year)										Target Reduction		-0.0105106	-0.0210212	-0.0245247	-0.0245247		-0.0245247
Linear Trajectory, NH3:	0.285303	0.288807	0.292311	0.295814	0.299318	0.302821	0.306325	0.309828	0.309828	0.309828		Achieved Reduction		-0.020216	-0.0238493	-0.0245247	-0.0282705		-0.0245247
Reductions Required, NH3:		-0.00350353	-0.00700707	-0.0105106	-0.0140141	-0.0175177	-0.0210212	-0.0245247	-0.0245247	-0.0245247		Linear Progress Met?		No	Yes	Yes	No		Yes
Reductions Achieved, NH3:		-0.00334371	-0.0119468	-0.020216	-0.0231375	-0.0245423	-0.0238493	-0.0245247	-0.0262376	-0.0282705
Balance (surplus/deficit), NH3:		0.000159818	-0.00493976	-0.00970542	-0.00912336	-0.00702466	-0.00282809	0	-0.00171289	-0.00374582

## Sheet: Emis-Rev5Pct
	REVISED 5% SIP NONATTAINMENT AREA EMISSION INVENTORY SUMMARIES & 5% REDUCTION ANALYSIS																						REVISED 5% SIP GRID 3 DOMAIN EMISSION INVENTORY SUMMARIES
	(DRAFT FINAL - 01/09/2024)																						(DRAFT FINAL - 01/09/2024)
		PM2.5 Emissions (tons/episode-day)																						Grid 3 Domain PM2.5 Emissions (tons/episode-day)											2020 Base Year Domain Emissions (tons/episode day) by Source Sector							2020 Base Year Grid 3 Domain Emissions Distribution by Source Sector
	Source Sector	2020	2021	2022	2023	2024	2025	2026	2027	2028	2029	2020	2021	2022	2023	2024	2025	2026	2027	2028	2029		Source Sector	2020	2021	2022	2023	2024	2025	2026	2027	2028	2029		Source Sector	PM2.5	SO2	NOx	VOC	NH3		Source Sector	PM2.5	SO2	NOx	VOC	NH3
	Point	0.578884	0.595793	0.603218	0.607295	0.611517	0.615841	0.619994	0.624148	0.628301	0.632454	0.582633	0.599651	0.607123	0.611227	0.615477	0.619828	0.624009	0.628189	0.632369	0.636549		Point	0.578884	0.595793	0.603218	0.607295	0.611517	0.615841	0.619994	0.624148	0.628301	0.632454		Point	0.578884	6.62689	13.538	0.0383132	0.0883912		Point	0.174135	0.339303	0.66472	0.00255997	0.275859
	Area-Space Heating	1.97423	1.743	1.57793	1.47973	1.3333	1.1438	0.9394	0.7389	0.6763	0.6104	1.55611	1.37705	1.08585	0.889066	0.739513	0.626894	0.506739	0.409042	0.330976	0.275727		Area-Space Heating	2.1439	1.94171	1.76971	1.66779	1.5825	1.3948	1.1885	0.9868	0.9259	0.8616		Area-Space Heating	2.1439	3.9519	2.3227	7.1389	0.1165		Area-Space Heating	0.644911	0.202341	0.114046	0.477	0.363583
	Area-Other	0.114096	0.115607	0.117527	0.119255	0.120933	0.122565	0.124038	0.125512	0.126985	0.128458	0.226583	0.229627	0.23323	0.236702	0.239797	0.242692	0.245587	0.239252	0.232918	0.226583		Area-Other	0.183504	0.185935	0.189023	0.191802	0.1945	0.197126	0.199495	0.201864	0.204234	0.206603		Area-Other	0.183504	0.670455	1.2365	2.29853	0.0508135		Area-Other	0.0552003	0.0343279	0.0607128	0.153581	0.158583
	Mobile-OnRoad	0.0738743	0.0663116	0.0655303	0.0624142	0.0588665	0.0560456	0.0537799	0.0516124	0.0489003	0.0484971	0.203114	0.190546	0.180685	0.172588	0.1628	0.158885	0.145619	0.137073	0.129524	0.123964		Mobile-OnRoad	0.102563	0.0917753	0.0903105	0.0857442	0.080858	0.0769461	0.0737293	0.0706256	0.0664418	0.0659659		Mobile-OnRoad	0.102563	0.00423159	1.77142	1.85942	0.0624477		Mobile-OnRoad	0.0308521	0.000216661	0.0869775	0.124241	0.194892
	Mobile-Aircraft	0.118653	0.119499	0.120355	0.121221	0.121221	0.122986	0.123884	0.124792	0.125712	0.126643												Mobile-Aircraft	0.193072	0.207856	0.208712	0.209579	0.209579	0.211343	0.212241	0.21315	0.21407	0.215		Mobile-Aircraft	0.193072	8.2745	0.653081	0.307086	0		Mobile-Aircraft	0.0580785	0.423662	0.0320666	0.0205186	0
	Mobile-NonRoad (less aircraft)	0.0899217	0.0880483	0.0856811	0.0832643	0.0805909	0.0773895	0.0769728	0.0769034	0.0781965	0.0761385	0.246788	0.243802	0.240675	0.237664	0.235814	0.23586	0.235905	0.235552	0.2352	0.234847		Mobile-NonRoad (less aircraft)	0.12241	0.119679	0.116445	0.113244	0.109737	0.10553	0.104945	0.104724	0.106179	0.103522		Mobile-NonRoad (less aircraft)	0.12241	0.00292832	0.844741	3.32401	0.00226939		Mobile-NonRoad (less aircraft)	0.0368225	0.000149932	0.0414772	0.2221	0.0070825
	TOTALS	2.94966	2.72826	2.57025	2.47318	2.32643	2.13863	1.93807	1.74187	1.68439	1.62259	2.80899	2.63425	2.34106	2.1407	1.98681	1.87752	1.75117	1.64238	1.55421	1.49085		TOTALS	3.32433	3.14275	2.97742	2.87545	2.78869	2.60159	2.39891	2.20131	2.14512	2.08515		TOTALS	3.32433	19.5309	20.3664	14.9663	0.320422		TOTALS	1	1	1	1	1
	Reduction from Prior Year:		0.221397	0.158016	0.0970611	0.146755	0.187802	0.200558	0.196202	0.0574729	0.0618041		0.174739	0.293194	0.200359	0.153891	0.109289	0.126345	0.108793	0.0881669	0.0633615		Reduction from Prior Year:		0.181588	0.165324	0.101971	0.0867596	0.187105	0.202681	0.197593	0.0561872	0.0599791
	Relative Reduction to 2020 (%):		0.0750585	0.12863	0.161535	0.211289	0.274958	0.342951	0.409468	0.428953	0.449906		0.0622072	0.166584	0.237912	0.292697	0.331604	0.376583	0.415313	0.446701	0.469257		Relative Reduction to 2020 (%):		0.0546239	0.104356	0.13503	0.161128	0.217411	0.27838	0.337819	0.35472	0.372763
	Space Heating Target, PM2.5:
	5% Reduction Target, PM2.5:	0.147483
	Reductions Required, PM2.5:		0.147483	0.294966	0.442449	0.589932	0.737415	0.884898	1.03238	1.17986	1.32735													Grid 3 Domain SO2 Emissions (tons/episode-day)											2020 Base Year Domain Space Heat Emissions (tons/episode day) by Use & Fuel Type							2020 Base Year Grid 3 Domain Space Heat Emissions Distribution by Use and Fuel Type
	Reductions Achieved, PM2.5:		0.221397	0.379413	0.476474	0.62323	0.811031	1.01159	1.20779	1.26526	1.32707												Source Sector	2020	2021	2022	2023	2024	2025	2026	2027	2028	2029		Source Sector	PM2.5	SO2	NOx	VOC	NH3		Source Sector	PM2.5	SO2	NOx	VOC	NH3
	Balance (surplus/deficit), PM2.5:		0.0739139	0.0844474	0.0340256	0.033298	0.0736166	0.126692	0.17541	0.0854005	0												Point	6.62689	6.82046	6.90545	6.95212	7.00046	7.04996	7.0975	7.14505	7.1926	7.24014		Residential Wood Combustion	2.0586	0.0492	0.2738	7.0198	0.0739		Residential Wood Combustion	0.960168	0.0124491	0.11787	0.983344	0.635426
	PM2.5 Target Met?	n/a	Yes	Yes	Yes	Yes	Yes	Yes	Yes	Yes	Yes												Area-Space Heating	3.9519	4.00969	4.02374	2.55976	2.2538	2.2594	2.2677	2.2758	2.283	2.2894		Residential Heating Oil	0.0543	3.4769	1.3369	0.0849	0.0029		Residential Heating Oil	0.0253265	0.87976	0.575531	0.0118929	0.0249355
	Relative MVEB Contributions:	0.025045			0.0252364			0.0277492	0.0296305		0.0298887												Area-Other	0.670455	0.679337	0.690619	0.700772	0.710631	0.720225	0.72888	0.737536	0.746192	0.754848		Residential Other (Coal, Gas)	0.0017	0.002	0.014	0.0029	0.0031		Residential Other (Coal, Gas)	0.00079291	0.00050606	0.00602695	0.000406236	0.0266552
		SO2 Emissions (tons/episode-day)																					Mobile-OnRoad	0.00423159	0.00412118	0.00422682	0.00413991	0.00405678	0.00398017	0.00390437	0.0038421	0.00378088	0.00377828		Commercial Wood Combustion	0.0003	0	0	0.001	0		Commercial Wood Combustion	0.000139925	0	0	0.000140082	0
	Source Sector	2020	2021	2022	2023	2024	2025	2026	2027	2028	2029	2020	2021	2022	2023	2024	2025	2026	2027	2028	2029		Mobile-Aircraft	8.2745	8.77125	8.8067	8.84258	8.84258	8.91562	8.95281	8.99043	9.02851	9.06705		Commercial Oil (incl. waste oil)	0.0152	0.4226	0.5194	0.02	0.0007		Commercial Oil (incl. waste oil)	0.00708955	0.10693	0.2236	0.00280163	0.00601892
	Point	6.62689	6.82046	6.90545	6.95212	7.00046	7.04996	7.0975	7.14505	7.1926	7.24014	5.82737	4.76521	4.82459	4.72771	2.81412	2.83402	2.85314	2.87225	2.89136	2.91047		Mobile-NonRoad	0.00292832	0.00292832	0.00292832	0.00292832	0.00292832	0.00292832	0.00292832	0.00292832	0.00292832	0.00292832		Commercial Other (Coal, Gas)	0.0139	0.0014	0.1788	0.0101	0.0357		Commercial Other (Coal, Gas)	0.00648321	0.000354242	0.0769727	0.00141482	0.306965
	Area-Space Heating	3.60574	3.71416	3.72938	2.37472	1.9665	1.9703	1.9755	1.9804	1.9857	1.9902	3.97677	4.10948	4.1719	2.27819	2.26927	2.26978	2.28554	2.19787	2.10942	1.97979		TOTALS	19.5309	20.2878	20.4337	19.0623	18.8145	18.9521	19.0537	19.1556	19.257	19.3581		TOTALS	2.144	3.9521	2.3229	7.1387	0.1163		TOTALS	1	1	1	1	1
	Area-Other	0.0284634	0.0288405	0.0293195	0.0297505	0.030169	0.0305763	0.0309438	0.0313113	0.0316787	0.0320462	0.0284634	0.0288458	0.0292983	0.0297345	0.0301232	0.0304869	0.0308506	0.0311966	0.0315426	0.0318886		Reduction from Prior Year:		-0.756881	-0.145882	1.37137	0.247849	-0.137662	-0.101608	-0.101868	-0.10142	-0.101136
	Mobile-OnRoad	0.00274537	0.00267544	0.00274468	0.00268973	0.00263727	0.00258891	0.00254106	0.0025017	0.0024631	0.00246217	0.00688042	0.00688262	0.00687694	0.00686345	0.006844	0.00705258	0.00671625	0.00666852	0.00662769	0.00659972		Relative Reduction to 2020 (%):		-0.038753	-0.0462223	0.0239929	0.036683	0.0296346	0.0244322	0.0192164	0.0140236	0.00884537
	Mobile-Aircraft	5.44102	5.47605	5.5115	5.54737	5.54737	5.62042	5.6576	5.69523	5.73331	5.77184
	Mobile-NonRoad	0.00227252	0.00227252	0.00227252	0.00227252	0.00227252	0.00227252	0.00227252	0.00227252	0.00227252	0.00227252	5.44329	5.47832	5.51377	5.54964	5.58595	5.6229	5.65986	5.69794	5.73602	5.7741
	TOTALS	15.7071	16.0444	16.1807	14.9089	14.5494	14.6761	14.7664	14.8568	14.948	15.039	16.0003	14.5603	14.7202	12.7821	10.8235	10.8823	10.9549	10.9256	10.8954	10.8241			Grid 3 Domain NOx Emissions (tons/episode-day)
	Reduction from Prior Year:		-0.337323	-0.136215	1.27174	0.359518	-0.126703	-0.0902477	-0.0904024	-0.0912547	-0.0909493		1.44003	-0.159837	1.93809	1.95855	-0.0587701	-0.0726536	0.0293825	0.0301551	0.0713236		Source Sector	2020	2021	2022	2023	2024	2025	2026	2027	2028	2029
	Relative Reduction to 2020 (%):		-0.0214758	-0.030148	0.0508177	0.0737065	0.0656399	0.0598942	0.0541387	0.048329	0.0425386		0.0899998	0.0800101	0.201138	0.323545	0.319872	0.315331	0.317168	0.319052	0.32351		Point	13.538	13.9334	14.107	14.2024	14.3011	14.4022	14.4994	14.5965	14.6936	14.7908
																							Area-Space Heating	2.3227	2.3821	2.415	2.4384	2.4571	2.4748	2.4899	2.5048	2.5207	2.5366
	5% Reduction Target, SO2:	0.785356																					Area-Other	1.2365	1.25288	1.27369	1.29241	1.3106	1.32829	1.34425	1.36022	1.37618	1.39214
	Reductions Required, SO2:		0.785356	1.57071	2.35607	3.14143	3.92678	4.71214	5.49749	6.28285	7.06821												Mobile-OnRoad	1.77142	1.58864	1.50773	1.37741	1.21992	1.12892	1.00424	0.945346	0.871965	0.815252
	Reduction Achieved, SO2:		-0.337323	-0.473538	0.798199	1.15772	1.03101	0.940766	0.850364	0.759109	0.66816												Mobile-Aircraft	0.653081	0.689269	0.691342	0.693441	0.693441	0.697715	0.69989	0.702091	0.704319	0.706573
	Balance (surplus/deficit), SO2:		-1.12268	-2.04425	-1.55787	-1.98371	-2.89577	-3.77137	-4.64713	-5.52374	-6.40005												Mobile-NonRoad	0.844741	0.855364	0.86517	0.873204	0.87687	0.87461	0.880146	0.884909	0.893571	0.889789
	SO2 Target Met?	n/a	No	No	No	No	No	No	No	No	No												TOTALS	20.3664	20.7017	20.8599	20.8772	20.859	20.9066	20.9178	20.9939	21.0604	21.1311
																							Reduction from Prior Year:		-0.335256	-0.158298	-0.0172913	0.0181992	-0.0475235	-0.0112289	-0.0760661	-0.0665033	-0.0707548
	Overall Target Met?	n/a	Yes	Yes	Yes	Yes	Yes	Yes	Yes	Yes	Yes												Relative Reduction to 2020 (%):		-0.0164612	-0.0242337	-0.0250827	-0.0241891	-0.0265226	-0.0270739	-0.0308088	-0.0340741	-0.0375482
		NOx Emissions (tons/episode-day)
	Source Sector	2020	2021	2022	2023	2024	2025	2026	2027	2028	2029													Grid 3 Domain VOC Emissions (tons/episode-day)
	Point	13.538	13.9334	14.107	14.2024	14.3011	14.4022	14.4994	14.5965	14.6936	14.7908												Source Sector	2020	2021	2022	2023	2024	2025	2026	2027	2028	2029
	Area-Space Heating	2.1672	2.2226	2.2532	2.275	2.2924	2.3089	2.3229	2.3369	2.3516	2.3664												Point	0.0383132	0.0394324	0.0399237	0.0401936	0.040473	0.0407592	0.0410341	0.041309	0.0415839	0.0418588
	Area-Other	0.360927	0.365709	0.371782	0.377248	0.382555	0.38772	0.39238	0.397039	0.401699	0.406359												Area-Space Heating	7.1389	7.0358	7.6057	8.3933	8.6083	8.6651	8.599	8.5562	8.6118	8.6674
	Mobile-OnRoad	1.17612	1.05875	1.00832	0.92472	0.824651	0.765789	0.686012	0.647981	0.601135	0.565478												Area-Other	2.29853	2.32898	2.36766	2.40247	2.43627	2.46916	2.49883	2.52851	2.55818	2.58786
	Mobile-Aircraft	0.433493	0.435542	0.437616	0.439715	0.439715	0.443988	0.446163	0.448365	0.450592	0.452847												Mobile-OnRoad	1.85942	1.75825	1.75328	1.67572	1.59064	1.52753	1.43566	1.38987	1.35616	1.33865
	Mobile-NonRoad	0.285357	0.294432	0.302792	0.309622	0.312976	0.311619	0.316309	0.320482	0.327842	0.325068												Mobile-Aircraft	0.307086	0.322838	0.324393	0.325966	0.325966	0.329169	0.3308	0.33245	0.33412	0.33581
	TOTALS	17.961	18.3104	18.4807	18.5287	18.5534	18.6202	18.6631	18.7473	18.8265	18.9069												Mobile-NonRoad	3.32401	3.23599	3.13944	3.04136	2.92286	2.78627	2.75777	2.74531	2.78697	2.70147
	Reduction from Prior Year:		-0.349374	-0.170311	-0.047943	-0.024736	-0.0668378	-0.0428784	-0.0841353	-0.0792325	-0.0804145												TOTALS	14.9663	14.7213	15.2304	15.879	15.9245	15.818	15.6631	15.5936	15.6888	15.6731
	Relative Reduction to 2020 (%):		-0.0194518	-0.028934	-0.0316033	-0.0329805	-0.0367017	-0.039089	-0.0437734	-0.0481847	-0.0526619												Reduction from Prior Year:		0.244975	-0.50912	-0.648594	-0.0455034	0.106513	0.154891	0.0694595	-0.095173	0.0157577
																							Relative Reduction to 2020 (%):		0.0163685	-0.0176494	-0.0609865	-0.0640269	-0.0569101	-0.0465607	-0.0419196	-0.0482788	-0.0472259
		VOC Emissions (tons/episode-day)
	Source Sector	2020	2021	2022	2023	2024	2025	2026	2027	2028	2029
	Point	0.0383132	0.0394324	0.0399237	0.0401936	0.040473	0.0407592	0.0410341	0.041309	0.0415839	0.0418588													Grid 3 Domain NH3 Emissions (tons/episode-day)
	Area-Space Heating	6.6634	6.5715	7.1084	7.8491	8.0547	8.1117	8.0533	8.0132	8.0653	8.1173												Source Sector	2020	2021	2022	2023	2024	2025	2026	2027	2028	2029
	Area-Other	2.11972	2.1478	2.18347	2.21557	2.24674	2.27707	2.30444	2.3318	2.35917	2.38654												Point	0.0883912	0.0909731	0.0921067	0.0927293	0.093374	0.0940342	0.0946684	0.0953026	0.0959368	0.0965709
	Mobile-OnRoad	1.42413	1.35054	1.34892	1.29153	1.23023	1.18335	1.11878	1.08481	1.0601	1.04714												Area-Space Heating	0.1165	0.1157	0.1219	0.1303	0.1328	0.1336	0.133	0.1326	0.1332	0.1338
	Mobile-Aircraft	0.154864	0.1564	0.157954	0.159528	0.159528	0.162731	0.164361	0.166011	0.167681	0.169371												Area-Other	0.0508135	0.0514867	0.0523417	0.0531112	0.0538584	0.0545855	0.0552416	0.0558976	0.0565536	0.0572096
	Mobile-NonRoad	2.64348	2.58338	2.51346	2.43987	2.3494	2.24576	2.22437	2.21784	2.25532	2.18912												Mobile-OnRoad	0.0624477	0.0638704	0.0655434	0.0642809	0.0632898	0.062313	0.0599825	0.0595068	0.0593695	0.0597
	TOTALS	13.0439	12.8491	13.3521	13.9958	14.0811	14.0214	13.9063	13.855	13.9492	13.9513												Mobile-Aircraft	0	0	0	0	0	0	0	0	0	0
	Reduction from Prior Year:		0.194852	-0.503071	-0.643658	-0.0852915	0.0596962	0.115093	0.0513095	-0.0941791	-0.00216908												Mobile-NonRoad	0.00226939	0.00229399	0.00231009	0.00231963	0.00230531	0.00226242	0.00227965	0.00229946	0.00235125	0.0023114
	Relative Reduction to 2020 (%):		0.0149382	-0.0236294	-0.0729749	-0.0795137	-0.0749371	-0.0661136	-0.06218	-0.0694002	-0.0695665												TOTALS	0.320422	0.324324	0.334202	0.342741	0.345628	0.346795	0.345172	0.345606	0.347411	0.349592
																							Reduction from Prior Year:		-0.00390236	-0.00987779	-0.00853908	-0.00288652	-0.00116756	0.00162305	-0.000434326	-0.00180468	-0.00218092
		NH3 Emissions (tons/episode-day)																					Relative Reduction to 2020 (%):		-0.0121788	-0.0430063	-0.0696558	-0.0786643	-0.0823081	-0.0772427	-0.0785982	-0.0842304	-0.0910368
	Source Sector	2020	2021	2022	2023	2024	2025	2026	2027	2028	2029
	Point	0.0883912	0.0909731	0.0921067	0.0927293	0.093374	0.0940342	0.0946684	0.0953026	0.0959368	0.0965709
	Area-Space Heating	0.1089	0.1081	0.1137	0.1214	0.1236	0.1243	0.1238	0.1235	0.124	0.1246
	Area-Other	0.0467725	0.0473922	0.0481793	0.0488875	0.0495753	0.0502446	0.0508485	0.0514523	0.0520562	0.05266
	Mobile-OnRoad	0.0397563	0.0406732	0.0417382	0.0409656	0.0403629	0.0397687	0.0383224	0.0380413	0.0379716	0.0381966
	Mobile-Aircraft	0	0	0	0	0	0	0	0	0	0
	Mobile-NonRoad	0.00148332	0.00150871	0.00152605	0.001537	0.00152869	0.00149823	0.00151349	0.00153196	0.0015765	0.00154638
	TOTALS	0.285303	0.288647	0.29725	0.305519	0.308441	0.309846	0.309153	0.309828	0.311541	0.313574
	Reduction from Prior Year:		-0.00334371	-0.00860311	-0.0082692	-0.00292147	-0.00140483	0.000693037	-0.000675444	-0.00171289	-0.00203293
	Relative Reduction to 2020 (%):		-0.0117199	-0.0418741	-0.070858	-0.0810979	-0.0860218	-0.0835927	-0.0859602	-0.0919639	-0.0990894
CONTROL MEASURE IMPLEMENTATION/PHASE-IN SCHEDULE FOR REVISED 5% SIP
(DRAFT FINAL - 01/09/2024)
Measure		Phase-In Schedule by Calendar Year
Abbrev	Measure Description	2020	2021	2022	2023	2024	2025	2026	2027	2028	2029
WSCO	WSCO Program	2791	3055	3267	3576	3974	4524	5078	5628	5778	5937
CURT	Curtailment Program	0.3	0.327	0.381	0.381	0.381	0.381	0.381	0.381	0.381	0.381
STF-12	Shift #2 to #1 Oil	n/a	n/a	n/a	0.7248	0.95	0.95	0.95	0.95	0.95	0.95
STF-13	Commercial Dry Wood	n/a	n/a	0.4	0.4	0.45	0.45	0.45	0.5	0.5	0.5
STF-17	Wood Device Removal	0	0.05	0.15	0.3	0.3	0.3	0.3	0.3	0.3	0.3
BACM-R8	Wood Emission Rates	0.22	0.25	0.3	0.35	0.35	0.35	0.35	0.35	0.35	0.35
BACM-48	Remove Coal Devices	n/a	n/a	n/a	n/a	0.25	0.25	0.25	0.25	0.25	0.25
STF-22	No Primary Wood Heat	0%/0%	0%/0%	0%/0%	0%/0%	20%/40%	20%/40%	20%/40%	20%/40%	20%/40%	20%/40%
STF-23	NOASH/Exmptn Rqmts	0	0.1	0.1	0.3	0.3	0.3	0.5	0.5	0.5	0.5
Notes:
1)	Start Year refers to when the measure is implemented by January 1 of the indicated year
2)	Phase-In percentages reflect compliance/penetration rates estimated as of January 1 of the indicated year
3)	Years shown in blue are RFP/QM years

## Sheet: SectorSum2020
2020		Modeling Domain Episodic Emissions (tons/day)					Emissions Contribution (%)						2019 Baseline 2020 Amendment Plan G3 Emissions						Relative Diff (%) - 2024 vs 2020 Amendment Baseline
	Source Sector	PM2.5	NOx	SO2	VOC	NH3	PM2.5	NOx	SO2	VOC	NH3		PM2.5	NOx	SO2	VOC	NH3		PM2.5	NOx	SO2	VOC	NH3
	Point	0.578884	13.538	6.62689	0.0383132	0.0883912	0.174135	0.66472	0.339303	0.00255997	0.275859		0.586886	10.3559	5.86683	0.0326674	0.0731443		-0.0136348	0.307274	0.129552	0.172829	0.20845
	Area, Space Heat, All	2.1439	2.3227	3.9519	7.1389	0.1165	0.644911	0.114046	0.202341	0.477	0.363583		2.2093	2.6086	4.1587	9.5527	0.1445		-0.0296021	-0.109599	-0.0497271	-0.252682	-0.193772
	Area, Space Heat, Wood	2.0589	0.2738	0.0492	7.0208	0.0739	0.619342	0.0134437	0.00251908	0.469108	0.230633		2.0529	0.4477	0.1706	9.3116	0.0962		0.00292269	-0.38843	-0.711606	-0.246016	-0.231809
	Area, Space Heat, Oil	0.0668	1.8301	3.8809	0.1044	0.0036	0.0200943	0.0898588	0.198706	0.00697569	0.0112352		0.0655	1.935	3.8694	0.1087	0.0037		0.0198473	-0.0542119	0.00297204	-0.0395584	-0.027027
	Area, Space Heat, Coal	0.002	0.0012	0.0022	0.0024	0.0003	0.000601624	5.89206e-05	0.000112642	0.000160361	0.000936266		0.0784	0.0585	0.101	0.1239	0.0156		-0.97449	-0.979487	-0.978218	-0.98063	-0.980769
	Area, Space Heat, Other	0.0163	0.2178	0.0198	0.0111	0.0385	0.00490324	0.0106941	0.00101378	0.000741668	0.120154		0.0125	0.1674	0.0177	0.0084	0.0289		0.304	0.301075	0.118644	0.321429	0.33218
	Area, Other	0.183504	1.2365	0.670455	2.29853	0.0508135	0.0552003	0.0607128	0.0343279	0.153581	0.158583		0.241011	0.383908	0.0302757	2.25468	0.0497507		-0.238605	2.22082	21.145	0.0194479	0.0213631
	Mobile, On-Road	0.102563	1.77142	0.00423159	1.85942	0.0624477	0.0308521	0.0869775	0.000216661	0.124241	0.194892		0.27231	2.29789	0.00910994	4.89533	0.0547682		-0.623362	-0.229113	-0.535498	-0.620165	0.140219
	Mobile, Aircraft	0.193072	0.653081	8.2745	0.307086	0	0.0580785	0.0320666	0.423662	0.0205186	0		0.349887	1.75483	7.78109	5.26292	0.00307863		-0.09833	-0.146458	0.0637876	-0.310061	-0.262858
	Mobile, Non-Road less aircraft	0.12241	0.844741	0.00292832	3.32401	0.00226939	0.0368225	0.0414772	0.000149932	0.2221	0.0070825		3.65939	17.4011	17.846	21.9983	0.325242		-0.0915618	0.170409	0.0944132	-0.319663	-0.0148197
	TOTALS	3.32433	20.3664	19.5309	14.9663	0.320422	1	1	1	1	1
		0.315483	1.49782	8.27743	3.6311	0.00226939
		NA Area Episodic Emissions (tons/day)					Emissions Contribution (%)						2020 Baseline Emissions Breakdown, Non-Attainment Area, PM2.5								2020 Baseline Emissions Breakdown, Non-Attainment Area, NOx								2020 Baseline Emissions Breakdown, Non-Attainment Area, SO2								2020 Baseline Emissions Breakdown, Non-Attainment Area, VOC								2020 Baseline Emissions Breakdown, Non-Attainment Area, NH3
	Source Sector	PM2.5	NOx	SO2	VOC	NH3	PM2.5	NOx	SO2	VOC	NH3
	Point	0.578884	13.538	6.62689	0.0383132	0.0883912	0.196255	0.75374	0.421903	0.00293725	0.309815
	Area, Space Heat, All	1.97423	2.1672	3.60574	6.6634	0.1089	0.669308	0.120661	0.229561	0.510844	0.381699
	Area, Space Heat, Wood	1.8922	0.2312	0.0396538	6.5525	0.0667	0.641498	0.0128723	0.00252457	0.502342	0.233786
	Area, Space Heat, Oil	0.0634843	1.7171	3.54424	0.0975	0.0034	0.0215226	0.0956013	0.225645	0.00747476	0.0119171
	Area, Space Heat, Coal	0.00203802	0.0012	0.00216472	0.0023	0.0003	0.000690934	6.68112e-05	0.000137818	0.000176328	0.00105151
	Area, Space Heat, Other	0.0166099	0.2178	0.0194825	0.0111	0.0385	0.00563111	0.0121262	0.00124036	0.000850972	0.134944
	Area, Other	0.114096	0.360927	0.0284634	2.11972	0.0467725	0.038681	0.020095	0.00181213	0.162506	0.16394
	Mobile, On-Road	0.0738743	1.17612	0.00274537	1.42413	0.0397563	0.025045	0.0654814	0.000174785	0.109179	0.139348
	Mobile, Aircraft	0.118653	0.433493	5.44102	0.154864	0	0.0402259	0.0241352	0.346404	0.0118725	0
	Mobile, Non-Road less aircraft	0.0899217	0.285357	0.00227252	2.64348	0.00148332	0.0304855	0.0158875	0.000144681	0.202661	0.00519911
	TOTALS	2.94966	17.961	15.7071	13.0439	0.285303	1	1	1	1	1
		NA Area Episodic Speciated PM2.5 Emissions (tons/day)
		PM2.5Tot	POC	PEC	PSO4	PNO3	PMFINE
	Area, Space Heat, Wood	1.8922	1.62582	0.249649	0.0112452	0.00545536	3.27457e-05
	Area, Space Heat, Oil	0.0634843	0.0261051	0.00400356	0.0212788	0.000858124	0.0112387
	OMNI Residential Heating PM2.5 Speciation Profiles
	Profile Description	ProfileID	POC	PEC	PSO4	PNO3	PMFINE	CheckSum
	Residential Wood Burning	92168	0.859221	0.131936	0.00594292	0.00288308	1.73056e-05	1
	Residential Heating Oil	92125	0.411205	0.0630637	0.335183	0.0135171	0.177031	1

## Sheet: SectorSum2026
2026		Modeling Domain Episodic Emissions (tons/day)					Emissions Contribution (%)						% Change Relative to 2020 Baseline - G3 Domain
	Source Sector	PM2.5	NOx	SO2	VOC	NH3	PM2.5	NOx	SO2	VOC	NH3		PM2.5	NOx	SO2	VOC	NH3
	Point	0.619994	14.4994	7.0975	0.0410341	0.0946684	0.258449	0.693159	0.3725	0.00261979	0.274264		0.0710158	0.0710158	0.0710158	0.0710158	0.0710158
	Area, Space Heat, All	1.1885	2.4899	2.2677	8.599	0.133	0.495434	0.119033	0.119016	0.548997	0.385315		-0.445636	0.0719852	-0.426175	0.204527	0.141631
	Area, Space Heat, Wood	1.1416	0.3385	0.0563	8.4753	0.0904	0.475884	0.0161824	0.0029548	0.5411	0.261898		-0.445529	0.236304	0.144309	0.20717	0.223275
	Area, Space Heat, Oil	0.03	1.9321	2.1904	0.1098	0.0037	0.0125057	0.0923663	0.114959	0.00701011	0.0107193		-0.550898	0.0557347	-0.435595	0.0517241	0.0277778
	Area, Space Heat, Coal	0.0009	0.0012	0.0014	0.0025	0.0003	0.000375171	5.73674e-05	7.34765e-05	0.000159611	0.000869132		-0.55	2.22045e-16	-0.363636	0.0416667	0
	Area, Space Heat, Other	0.0162	0.2178	0.0197	0.0111	0.0385	0.00675308	0.0104122	0.00103392	0.000708672	0.111539		-0.00613497	-1.11022e-16	-0.00505051	2.22045e-16	0
	Area, Other	0.199495	1.34425	0.72888	2.49883	0.0552416	0.083161	0.0642636	0.038254	0.159536	0.160041		0.0871435	0.0871435	0.0871435	0.0871435	0.0871435
	Mobile, On-Road	0.0737293	1.00424	0.00390437	1.43566	0.0599825	0.0307346	0.0480089	0.000204914	0.0916586	0.173776		-0.281128	-0.433087	-0.0773278	-0.2279	-0.0394769
	Mobile, Aircraft	0.212241	0.69989	8.95281	0.3308	0	0.0884742	0.0334591	0.469872	0.0211197	0		0.0992829	0.0716746	0.0819754	0.0772215	0
	Mobile, Non-Road less aircraft	0.104945	0.880146	0.00292832	2.75777	0.00227965	0.0437471	0.0420764	0.000153687	0.176068	0.00660439		-0.142677	0.0419123	0	-0.170347	0.00452399
	TOTALS	2.39891	20.9178	19.0537	15.6631	0.345172	1	1	1	1	1		-0.27838	0.0270739	-0.0244322	0.0465607	0.0772427
		NA Area Episodic Emissions (tons/day)					Emissions Contribution (%)						% Change Relative to 2020 Baseline -NA Area
	Source Sector	PM2.5	NOx	SO2	VOC	NH3	PM2.5	NOx	SO2	VOC	NH3		PM2.5	NOx	SO2	VOC	NH3
	Point	0.619994	14.4994	7.0975	0.0410341	0.0946684	0.319903	0.776899	0.480654	0.00295076	0.306219		0.0710158	0.0710158	0.0710158	0.0710158	0.0710158
	Area, Space Heat, All	0.9394	2.3229	1.9755	8.0533	0.1238	0.484709	0.124465	0.133784	0.579112	0.400449		-0.524169	0.0718439	-0.452123	0.208587	0.136823
	Area, Space Heat, Wood	0.8969	0.286	0.0458	7.9368	0.0815	0.46278	0.0153243	0.00310164	0.570735	0.263624		-0.526001	0.237024	0.154997	0.211263	0.221889
	Area, Space Heat, Oil	0.0254	1.8178	1.9088	0.1028	0.0035	0.0131058	0.0974006	0.129267	0.00739234	0.0113213		-0.599901	0.0586454	-0.461436	0.054359	0.0294118
	Area, Space Heat, Coal	0.0009	0.0012	0.0013	0.0025	0.0003	0.00046438	6.42979e-05	8.80379e-05	0.000179775	0.000970394		-0.558395	0	-0.399461	0.0869565	0
	Area, Space Heat, Other	0.0162	0.2178	0.0197	0.0111	0.0385	0.00835883	0.0116701	0.00133411	0.0007982	0.124534		-0.0246757	0	0.011164	0	0
	Area, Other	0.124038	0.39238	0.0309438	2.30444	0.0508485	0.0640011	0.0210243	0.00209556	0.165712	0.164477		0.0871435	0.0871435	0.0871435	0.0871435	0.0871435
	Mobile, On-Road	0.0537799	0.686012	0.00254106	1.11878	0.0383224	0.0277492	0.0367576	0.000172084	0.0804517	0.123959		-0.272007	-0.416714	-0.074421	-0.214407	-0.036069
	Mobile, Aircraft	0.123884	0.446163	5.6576	0.164361	0	0.0639212	0.0239061	0.383141	0.0118192	0		0.0440871	0.029229	0.0398054	0.0613282	0
	Mobile, Non-Road less aircraft	0.0769728	0.316309	0.00227252	2.22437	0.00151349	0.0397162	0.0169483	0.000153898	0.159954	0.00489559		-0.144002	0.108468	0	-0.158547	0.0203339
	TOTALS	1.93807	18.6631	14.7664	13.9063	0.309153	1	1	1	1	1		-0.342951	0.039089	-0.0598942	0.0661136	0.0835927

## Sheet: SectorSum2027
2027		Modeling Domain Episodic Emissions (tons/day)					Emissions Contribution (%)						% Change Relative to 2020 Baseline - G3 Domain
	Source Sector	PM2.5	NOx	SO2	VOC	NH3	PM2.5	NOx	SO2	VOC	NH3		PM2.5	NOx	SO2	VOC	NH3
	Point	0.624148	14.5965	7.14505	0.041309	0.0953026	0.283534	0.695275	0.373001	0.00264909	0.275755		0.0781905	0.0781905	0.0781905	0.0781905	0.0781905
	Area, Space Heat, All	0.9868	2.5048	2.2758	8.5562	0.1326	0.448278	0.119311	0.118806	0.548698	0.383673		-0.539717	0.0784001	-0.424125	0.198532	0.138197
	Area, Space Heat, Wood	0.9433	0.3371	0.0554	8.4318	0.0901	0.428517	0.0160571	0.00289211	0.54072	0.260701		-0.541843	0.231191	0.126016	0.200974	0.219215
	Area, Space Heat, Oil	0.0266	1.9488	2.1995	0.1108	0.0038	0.0120837	0.0928271	0.114823	0.00710546	0.0109952		-0.601796	0.0648598	-0.43325	0.0613027	0.0555556
	Area, Space Heat, Coal	0.0008	0.0012	0.0014	0.0025	0.0003	0.00036342	5.71596e-05	7.30857e-05	0.000160322	0.000868039		-0.6	2.22045e-16	-0.363636	0.0416667	0
	Area, Space Heat, Other	0.0162	0.2178	0.0197	0.0111	0.0385	0.00735925	0.0103745	0.00102842	0.000711829	0.111398		-0.00613497	-1.11022e-16	-0.00505051	0	0
	Area, Other	0.201864	1.36022	0.737536	2.52851	0.0558976	0.0917019	0.0647912	0.0385024	0.16215	0.161738		0.100054	0.100054	0.100054	0.100054	0.100054
	Mobile, On-Road	0.0706256	0.945346	0.0038421	1.38987	0.0595068	0.0320834	0.0450297	0.000200573	0.0891303	0.172181		-0.31139	-0.466333	-0.0920434	-0.252527	-0.0470943
	Mobile, Aircraft	0.21315	0.702091	8.99043	0.33245	0	0.0968286	0.0334427	0.469337	0.0213196	0		0.10399	0.0750453	0.0865228	0.0825948	0
	Mobile, Non-Road less aircraft	0.104724	0.884909	0.00292832	2.74531	0.00229946	0.0475736	0.0421508	0.00015287	0.176053	0.0066534		-0.144481	0.0475508	0	-0.174098	0.0132514
	TOTALS	2.20131	20.9939	19.1556	15.5936	0.345606	1	1	1	1	1		-0.337819	0.0308088	-0.0192164	0.0419196	0.0785982
		NA Area Episodic Emissions (tons/day)					Emissions Contribution (%)						% Change Relative to 2020 Baseline -NA Area
	Source Sector	PM2.5	NOx	SO2	VOC	NH3	PM2.5	NOx	SO2	VOC	NH3		PM2.5	NOx	SO2	VOC	NH3
	Point	0.624148	14.5965	7.14505	0.041309	0.0953026	0.358321	0.778593	0.480929	0.00298153	0.307598		0.0781905	0.0781905	0.0781905	0.0781905	0.0781905
	Area, Space Heat, All	0.7389	2.3369	1.9804	8.0132	0.1235	0.4242	0.124653	0.1333	0.578363	0.398608		-0.625727	0.0783038	-0.450764	0.202569	0.134068
	Area, Space Heat, Wood	0.7	0.2846	0.0448	7.8959	0.0811	0.401868	0.0151809	0.00301546	0.569896	0.261758		-0.63006	0.230969	0.129779	0.205021	0.215892
	Area, Space Heat, Oil	0.022	1.8332	1.9146	0.1036	0.0035	0.0126301	0.0977849	0.128871	0.00747746	0.0112966		-0.653458	0.067614	-0.4598	0.0625641	0.0294118
	Area, Space Heat, Coal	0.0008	0.0012	0.0013	0.0025	0.0003	0.000459277	6.40093e-05	8.75022e-05	0.000180441	0.000968279		-0.607462	0	-0.399461	0.0869565	0
	Area, Space Heat, Other	0.0162	0.2178	0.0197	0.0111	0.0385	0.00930036	0.0116177	0.001326	0.000801156	0.124262		-0.0246757	0	0.011164	0	0
	Area, Other	0.125512	0.397039	0.0313113	2.3318	0.0514523	0.0720557	0.0211785	0.00210754	0.168301	0.166067		0.100054	0.100054	0.100054	0.100054	0.100054
	Mobile, On-Road	0.0516124	0.647981	0.0025017	1.08481	0.0380413	0.0296305	0.034564	0.000168388	0.0782976	0.122782		-0.301348	-0.44905	-0.0887561	-0.238262	-0.0431387
	Mobile, Aircraft	0.124792	0.448365	5.69523	0.166011	0	0.0716429	0.0239163	0.383342	0.0119821	0		0.0517467	0.0343071	0.046721	0.0719832	0
	Mobile, Non-Road less aircraft	0.0769034	0.320482	0.00227252	2.21784	0.00153196	0.04415	0.0170949	0.000152962	0.160075	0.00494455		-0.144774	0.123095	0	-0.161017	0.032788
	TOTALS	1.74187	18.7473	14.8568	13.855	0.309828	1	1	1	1	1		-0.409468	0.0437734	-0.0541387	0.06218	0.0859602
		NA Area Episodic Speciated PM2.5 Emissions (tons/day)
		PM2.5Tot	POC	PEC	PSO4	PNO3	PMFINE
	Area, Space Heat, Wood	0.7	0.601455	0.0923551	0.00416004	0.00201816	1.21139e-05
	Area, Space Heat, Oil	0.022	0.00904651	0.0013874	0.00737402	0.000297376	0.00389469
	OMNI Residential Heating PM2.5 Speciation Profiles
	Profile Description	ProfileID	POC	PEC	PSO4	PNO3	PMFINE	CheckSum
	Residential Wood Burning	92168	0.859221	0.131936	0.00594292	0.00288308	1.73056e-05	1
	Residential Heating Oil	92125	0.411205	0.0630637	0.335183	0.0135171	0.177031	1

## Sheet: SectorSum2027PB
2027	Projected Baseline	Modeling Domain Episodic Emissions (tons/day)					Emissions Contribution (%)						% Change Relative to 2020 Baseline - G3 Domain
	Source Sector	PM2.5	NOx	SO2	VOC	NH3	PM2.5	NOx	SO2	VOC	NH3		PM2.5	NOx	SO2	VOC	NH3
	Point	0.624148	14.5965	7.14505	0.041309	0.0953026	0.182392	0.695275	0.340718	0.00264909	0.275755		0.0781905	0.0781905	0.0781905	0.0781905	0.0781905
	Area, Space Heat, All	2.2075	2.5048	4.0908	8.5562	0.1326	0.645088	0.119311	0.195073	0.548698	0.383673		0.0296656	0.0784001	0.0351477	0.198532	0.138197
	Area, Space Heat, Wood	2.11019	0.3371	0.0995827	8.4318	0.0901	0.616652	0.0160571	0.00474868	0.54072	0.260701		0.024911	0.231191	1.02404	0.200974	0.219215
	Area, Space Heat, Oil	0.059505	1.9488	3.95365	0.1108	0.0038	0.0173889	0.0928271	0.188533	0.00710546	0.0109952		-0.109207	0.0648598	0.0187454	0.0613027	0.0555556
	Area, Space Heat, Coal	0.00178962	0.0012	0.00251653	0.0025	0.0003	0.000522974	5.71596e-05	0.000120003	0.000160322	0.000868039		-0.105188	2.22045e-16	0.143877	0.0416667	0
	Area, Space Heat, Other	0.0362399	0.2178	0.0354112	0.0111	0.0385	0.0105902	0.0103745	0.00168861	0.000711829	0.111398		1.2233	-1.11022e-16	0.788443	0	0
	Area, Other	0.201864	1.36022	0.737536	2.52851	0.0558976	0.05899	0.0647912	0.03517	0.16215	0.161738		0.100054	0.100054	0.100054	0.100054	0.100054
	Mobile, On-Road	0.0706256	0.945346	0.0038421	1.38987	0.0595068	0.0206386	0.0450297	0.000183214	0.0891303	0.172181		-0.31139	-0.466333	-0.0920434	-0.252527	-0.0470943
	Mobile, Aircraft	0.21315	0.702091	8.99043	0.33245	0	0.0622879	0.0334427	0.428716	0.0213196	0		0.10399	0.0750453	0.0865228	0.0825948	0
	Mobile, Non-Road less aircraft	0.104724	0.884909	0.00292832	2.74531	0.00229946	0.0306032	0.0421508	0.000139639	0.176053	0.0066534		-0.144481	0.0475508	0	-0.174098	0.0132514
	TOTALS	3.42201	20.9939	20.9706	15.5936	0.345606	1	1	1	1	1		0.0293828	0.0308088	0.0737132	0.0419196	0.0785982
		NA Area Episodic Emissions (tons/day)					Emissions Contribution (%)						% Change Relative to 2020 Baseline -NA Area
	Source Sector	PM2.5	NOx	SO2	VOC	NH3	PM2.5	NOx	SO2	VOC	NH3		PM2.5	NOx	SO2	VOC	NH3
	Point	0.624148	14.5965	7.14505	0.041309	0.0953026	0.210678	0.778593	0.428572	0.00298153	0.307598		0.0781905	0.0781905	0.0781905	0.0781905	0.0781905
	Area, Space Heat, All	1.9596	2.3369	3.7954	8.0132	0.1235	0.661453	0.124653	0.227654	0.578363	0.398608		-0.0074103	0.0783038	0.0526	0.202569	0.134068
	Area, Space Heat, Wood	1.85644	0.2846	0.0858584	7.8959	0.0811	0.626631	0.0151809	0.00514993	0.569896	0.261758		-0.0189008	0.230969	1.1652	0.205021	0.215892
	Area, Space Heat, Oil	0.0583451	1.8332	3.6693	0.1036	0.0035	0.0196941	0.0977849	0.22009	0.00747746	0.0112966		-0.0809524	0.067614	0.0352841	0.0625641	0.0294118
	Area, Space Heat, Coal	0.00212164	0.0012	0.00249143	0.0025	0.0003	0.000716149	6.40093e-05	0.00014944	0.000180441	0.000968279		0.0410303	0	0.150922	0.0869565	0
	Area, Space Heat, Other	0.0429632	0.2178	0.0377547	0.0111	0.0385	0.014502	0.0116177	0.00226459	0.000801156	0.124262		1.58661	0	0.937877	0	0
	Area, Other	0.125512	0.397039	0.0313113	2.3318	0.0514523	0.0423658	0.0211785	0.0018781	0.168301	0.166067		0.100054	0.100054	0.100054	0.100054	0.100054
	Mobile, On-Road	0.0516124	0.647981	0.0025017	1.08481	0.0380413	0.0174215	0.034564	0.000150056	0.0782976	0.122782		-0.301348	-0.44905	-0.0887561	-0.238262	-0.0431387
	Mobile, Aircraft	0.124792	0.448365	5.69523	0.166011	0	0.0421231	0.0239163	0.341609	0.0119821	0		0.0517467	0.0343071	0.046721	0.0719832	0
	Mobile, Non-Road less aircraft	0.0769034	0.320482	0.00227252	2.21784	0.00153196	0.0259584	0.0170949	0.000136309	0.160075	0.00494455		-0.144774	0.123095	0	-0.161017	0.032788
	TOTALS	2.96257	18.7473	16.6718	13.855	0.309828	1	1	1	1	1		0.00437647	0.0437734	0.0614139	0.06218	0.0859602

## Sheet: OYWCalcs
EVALUATION OF ONE YEAR'S WORTH (OYW) OF PROGRESS UNDER
PROPOSED MARCH 2023 EPA CONTINGENCY MEASURE GUIDANCE
(Based on Fairbanks Revised 5% SIP Base Year and Attainment Inventories)
		NA Area Emissions (tpd)
Year		PM2.5	SO2
2020	Base Year Emissions	2.94966	15.7071
2026	Attainment Year Emissions	1.93807	14.7664
2027	Attainment Year Emissions	1.74187	14.8568
2028	Attainment Year Emissions	1.68439	14.948
2029	Attainment Year Emissions	1.62259	15.039
2026	Total Attainment Required Reduction	1.01159	0.940766
2027	Total Attainment Required Reduction	1.20779	0.850364
2028	Total Attainment Required Reduction	1.26526	0.759109
2029	Total Attainment Required Reduction	1.32707	0.66816
		Contingency Measure OYW Targets (tpd)
		OYW Attainment		OYW RFP
		Per 2023 Guidance		Ann Avg Reduction
	If Attainment Year Is:	PM2.5	SO2	PM2.5	SO2
	2026	0.110777	0.147403	0.168598	0.156794
	2027	0.101891	0.114904	0.172542	0.121481
	2028	0.0903157	0.0903028	0.158158	0.0948887
	2029	0.0811125	0.0710819	0.147452	0.07424

## Sheet: PointsNoBACT
FAIRBANKS REVISED 5% SIP 2019-2020 EPISODIC POINT SOURCE EMISSIONS (TONS/DAY) BY CALENDAR YEAR
(WITHOUT SO2 BACT CONTROLS)
															Growth
Calendar	TOTALS ACROSS ALL POINT SOURCE FACILITIES (TONS/DAY)							Back-Calculated Growth Factors (Relative to 2020)							Factor
Year	PM25-PRI	PM10-PRI	SO2	NOx	VOC	CO	NH3	PM25-PRI	PM10-PRI	SO2	NOx	VOC	CO	NH3	Check
2020	0.578884	0.623436	6.62689	13.538	0.0383132	4.61464	0.0883912	1	1	1	1	1	1	1	1
2021	0.595793	0.641646	6.82046	13.9334	0.0394324	4.74943	0.0909731	1.02921	1.02921	1.02921	1.02921	1.02921	1.02921	1.02921	1.02921
2022	0.603218	0.649642	6.90545	14.107	0.0399237	4.80861	0.0921067	1.04203	1.04203	1.04203	1.04203	1.04203	1.04203	1.04203	1.04203
2023	0.607295	0.654033	6.95212	14.2024	0.0401936	4.84111	0.0927293	1.04908	1.04908	1.04908	1.04908	1.04908	1.04908	1.04908	1.04908
2024	0.611517	0.65858	7.00046	14.3011	0.040473	4.87477	0.093374	1.05637	1.05637	1.05637	1.05637	1.05637	1.05637	1.05637	1.05637
2025	0.615841	0.663237	7.04996	14.4022	0.0407592	4.90924	0.0940342	1.06384	1.06384	1.06384	1.06384	1.06384	1.06384	1.06384	1.06384
2026	0.619994	0.66771	7.0975	14.4994	0.0410341	4.94235	0.0946684	1.07102	1.07102	1.07102	1.07102	1.07102	1.07102	1.07102	1.07102
2027	0.624148	0.672183	7.14505	14.5965	0.041309	4.97546	0.0953026	1.07819	1.07819	1.07819	1.07819	1.07819	1.07819	1.07819	1.07819
2028	0.628301	0.676656	7.1926	14.6936	0.0415839	5.00857	0.0959368	1.08537	1.08537	1.08537	1.08537	1.08537	1.08537	1.08537	1.08537
2029	0.632454	0.681129	7.24014	14.7908	0.0418588	5.04167	0.0965709	1.09254	1.09254	1.09254	1.09254	1.09254	1.09254	1.09254	1.09254

## Sheet: SpaceHeat
CONTROL MEASURE IMPLEMENTATION/PHASE-IN SCHEDULE FOR REVISED 5% SIP -- SPACE HEATING EI UPDATED WITH 2019-2020 EPISODE & 2023 HOME HEATING SURVEY
(DRAFT FINAL - 01/09/2024)
Measure			Implementation	Phase-In Schedule by Calendar Year
Abbrev	Measure Description	Start Year	Parameter	2020	2021	2022	2023	2024	2025	2026	2027	2028	2029
WSCO	WSCO Program	2010, On-going	No. of Changeouts (includes pre-2013)	2791	3055	3267	3576	3974	4524	5078	5628	5778	5937
CURT	Curtailment Program	2016, On-going	Compliance Rate	0.3	0.327	0.381	0.381	0.381	0.381	0.381	0.381	0.381	0.381
STF-12	Shift #2 to #1 Oil	2023	Combined Penetration/Compliance Rate	n/a	n/a	n/a	0.7248	0.95	0.95	0.95	0.95	0.95	0.95
STF-13	Commercial Dry Wood	2022	Combined Penetration/Compliance Rate	n/a	n/a	0.4	0.4	0.45	0.45	0.45	0.5	0.5	0.5
STF-17	Wood Device Removal	2024	Combined Penetration/Compliance Rate	0	0.05	0.15	0.3	0.3	0.3	0.3	0.3	0.3	0.3
BACM-R8	Wood Emission Rates	2020	Combined Penetration/Compliance Rate	0.22	0.25	0.3	0.35	0.35	0.35	0.35	0.35	0.35	0.35
BACM-48	Remove Coal Devices	2024	Combined Penetration/Compliance Rate	n/a	n/a	n/a	n/a	0.25	0.25	0.25	0.25	0.25	0.25
STF-22	No Primary Wood Heat	2020	Combined Penetration/Compliance Rate	0%/0%	0%/0%	0%/0%	0%/0%	20%/40%	20%/40%	20%/40%	20%/40%	20%/40%	20%/40%
STF-23	NOASH/Exmptn Rqmts	2020	Combined Penetration/Compliance Rate	0	0.1	0.1	0.3	0.3	0.3	0.5	0.5	0.5	0.5
Notes:
1)	Start Year refers to when the measure is implemented by January 1 of the indicated year
2)	Phase-In percentages reflect compliance/penetration rates estimated as of January 1 of the indicated year
3)	Years shown in blue are RFP/QM years
SPACE HEATING NONATTAINMENT AREA EMISSIONS BY CALENDAR YEAR AND CONTROL MEASURE																Reductions Relative
																to 2020 Baseline
		Measure		PM2.5 Emissions (tons/episode-day)										Measure	PM2.5 Reductions
		Abbrev	Measure Description	2020	2021	2022	2023	2024	2025	2026	2027	2028	2029	Abbrev	2023	2026	2027	2029
		BASE	Baseline	1.62129	1.60441	1.73431	1.91211	1.96368	1.98	1.96875	1.9596	1.97226	1.98492
		WSCO	WSCO Program	0.342382	0.18791	0.0825659	0	-0.161082	-0.368411	-0.562728	-0.745354	-0.806841	-0.871644	WSCO	0.342382	0.905111	1.08774	1.21403
		CURT	Curtailment Program	0.0190027	0.0123964	0	0	0	-2.22045e-16	-3.33067e-16	-1.11022e-16	0	1.11022e-16	CURT-S1	0.0190727	0.0190727	0.0190727	0.0190727
		STF-12	Shift #2 to #1 Oil				-0.0133467	-0.016122	-0.0155172	-0.0153245	-0.0151864	-0.0151167	-0.0150483	CURT-S2	0.123959	0.123959	0.123959	0.123959
		STF-13	Commercial Dry Wood			-0.0551982	-0.0574878	-0.0618436	-0.0596225	-0.0575037	-0.0619565	-0.0616366	-0.0613235	STF-12	0.0133467	0.0153245	0.0151864	0.0150483
		STF-17	Wood Device Removal	0	-0.0423826	-0.144207	-0.297625	-0.282538	-0.270616	-0.259473	-0.251607	-0.250308	-0.249036	STF-13	0.0574878	0.0575037	0.0619565	0.0613235
		BACM-R8	Wood Emission Rates	-0.00906887	-0.0192321	-0.0394243	-0.0635416	-0.0754194	-0.0867032	-0.0970068	-0.107504	-0.120317	-0.133006	STF-17	0.297625	0.259473	0.251607	0.249036
		BACM-48	Remove Coal Devices					-0.000374295	-0.000360488	-0.000352195	-0.00034556	-0.000343762	-0.000342002	BACM-R8	0.0544727	0.0879379	0.0984348	0.123937
		STF-22	No Primary Wood Heat	0	0	0	0	-0.032646	-0.0345968	-0.0363882	-0.0381887	-0.0408806	-0.0435473	BACM-48	0	0.000352195	0.00034556	0.000342002
		STF-23	NOASH/Exmptn Rqmts	0	-9.59466e-05	-0.000114484	-0.000371116	-0.000358562	-0.000348864	-0.000565349	-0.000548225	-0.000545396	-0.000542625	STF-22	0	0.0363882	0.0381887	0.0435473
														STF-23	0.000371116	0.000565349	0.000548225	0.000542625
		TOTALS (OVERLAP-ADJUSTED)		1.97361	1.743	1.57793	1.47973	1.3333	1.14382	0.93941	0.738913	0.676272	0.610433	TOTAL-S1	0.455299	1.05227	1.24362	1.39742
					0.116844	0.200482	0.250238	0.324437	0.420441	0.524013	0.625602	0.657342	0.690702	TOTAL-S2	0.582202	1.17917	1.37052	1.52432
										1.0342	1.23469
		Measure		SO2 Emissions (tons/episode-day)										Measure	SO2 Reductions
		Abbrev	Measure Description	2020	2021	2022	2023	2024	2025	2026	2027	2028	2029	Abbrev	2023	2026	2027	2029
		BASE	Baseline	3.57886	3.69273	3.70859	3.69086	3.70726	3.73375	3.76449	3.79545	3.82061	3.84579
		WSCO	WSCO Program	0.0296421	0.0227383	0.0199781	0	-0.016037	-0.0382538	-0.0608667	-0.0832671	-0.100143	-0.118053	WSCO	0.0296421	0.0905089	0.112909	0.147696
		CURT	Curtailment Program	-0.00264494	-0.00201711	4.44089e-16	4.44089e-16	2.22045e-16	2.22045e-16	0	0	-4.44089e-16	0	CURT-S1	-0.00453621	-0.00453621	-0.00453621	-0.00453621
		STF-12	Shift #2 to #1 Oil				-1.3188	-1.72676	-1.72725	-1.73047	-1.73403	-1.73706	-1.73965	CURT-S2	-0.0191289	-0.0191289	-0.0191289	-0.0191289
		STF-13	Commercial Dry Wood			-0.00151156	-0.00166805	-0.00192409	-0.00193085	-0.00190924	-0.00209706	-0.00210083	-0.00210408	STF-12	1.3188	1.73047	1.73403	1.73965
		STF-17	Wood Device Removal	0	0.000987132	0.00286467	0.00523968	0.00519492	0.00525773	0.00539688	0.00547047	0.00547994	0.00548803	STF-13	0.00166805	0.00190924	0.00209706	0.00210408
		BACM-R8	Wood Emission Rates	-0.000129119	-0.000283012	-0.000544642	-0.000914663	-0.00114816	-0.0013568	-0.00153869	-0.00173832	-0.00195912	-0.00218016	STF-17	-0.00523968	-0.00539688	-0.00547047	-0.00548803
		BACM-48	Remove Coal Devices					-0.00040117	-0.000401508	-0.000401364	-0.000401275	-0.000401981	-0.000402586	BACM-R8	0.000785544	0.00140957	0.0016092	0.00205104
		STF-22	No Primary Wood Heat	0	0	0	0	0.000461978	0.000635915	0.000829008	0.00102621	0.00120851	0.00139109	BACM-48	0	0.000401364	0.000401275	0.000402586
		STF-23	NOASH/Exmptn Rqmts	0	0	0	0	0	0	0	0	0	0	STF-22	0	-0.000829008	-0.00102621	-0.00139109
														STF-23	0	0	0	0
		TOTALS (OVERLAP-ADJUSTED)		3.60573	3.71416	3.72938	2.37472	1.96664	1.97046	1.97553	1.98041	1.98564	1.99027	TOTAL-S1	1.31158	1.7844	1.81048	1.85096
					-0.0300698	-0.0342923	0.341404	0.454578	0.453521	0.452115	0.450761	0.449311	0.448026	TOTAL-S2	1.29686	1.76968	1.79576	1.83623

[truncated: 21 more sheets: OnRoad, 2020NRARSummary, 2021NRARSummary, 2022NRARSummary, 2023NRARSummary, 2024NRARSummary, 2025NRARSummary, 2026NRARSummary, 2027NRARSummary, 2028NRARSummary, 2029NRARSummary, TabSpHt2020, TabSpHt2021, TabSpHt2022, TabSpHt2023, TabSpHt2024, TabSpHt2025, TabSpHt2026, TabSpHt2027, TabSpHt2028 …]
